# Supplementary material for: PEGylation as an efficient tool to enhance cytochrome c thermostability: a kinetic and thermodynamic study
Source: Royal Society of Chemistry journal article supplement (doi:10.1039/c9tb00590k), 2019-01-01
Supplement: c9tb00590k1.pdf [file c9tb00590k1.pdf]

## Electronic Supporting Information (ESI)

### **PEGylation as an efficient tool to enhance cytochrome c thermostability: a kinetic and thermodynamic study**

João H. P. M. Santos<sup>1,2</sup>, Gustavo Carretero<sup>3</sup>, Sónia P. M. Ventura<sup>1</sup>, Attilio Converti<sup>4</sup>,  
Carlota O. Rangel-Yagui<sup>2</sup>

<sup>1</sup>CICECO - Aveiro Institute of Materials, Department of Chemistry, University of Aveiro, 3810-193 Aveiro, Portugal.

<sup>2</sup>Department of Biochemical and Pharmaceutical Technology, University of São Paulo, Av. Prof. Lineu Prestes n 580 Bloco 16, 05508-000 São Paulo, SP Brazil.

<sup>3</sup>Department of Biochemistry, Chemistry Institute, São Paulo University, São Paulo, SP Brazil.

<sup>4</sup>Department of Civil, Chemical and Environmental Engineering, Pole of Chemical Engineering, Genoa University, via Opera Pia 15, 16145 Genoa, Italy.

**Table S1.** Thermodynamic parameters of Cyt-c catalysed reaction and reversible unfolding of native Cyt-c, Cyt-c-PEG-4 and Cyt-c-PEG-8 estimated according to Arrhenius. The concentration of non-PEGylated and PEGylated Cyt-c was 10  $\mu$ M in 0.01 M potassium phosphate buffer (0.14 M of NaCl, pH 7.4). The catalytic oxidation of ABTS was performed in the temperature range of 30–100 °C ( $\Delta T = 10$  °C).

| <b>Protein</b> | <b><math>E^*</math><br/>(kJ.mol<sup>-1</sup>)</b> | <b><math>\Delta H^{\circ}_U</math><br/>(kJ.mol<sup>-1</sup>)</b> |
|----------------|---------------------------------------------------|------------------------------------------------------------------|
| Cyt-c          | 10.22±0.40                                        | 33.82±4.92                                                       |
| Cyt-c-PEG-4    | 7.51±0.06                                         | 109.4±13.1                                                       |
| Cyt-c-PEG-8    | 8.87±0.29                                         | 58.43±3.11                                                       |

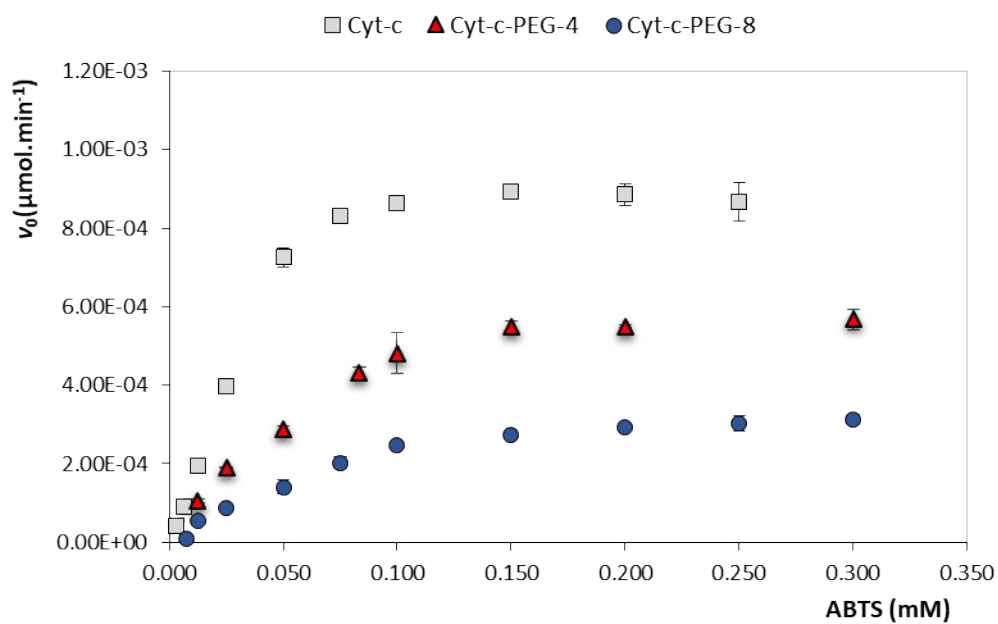

**Figure S1.** Kinetics of ABTS (0.025-0.300 mM) by 25 mM  $\text{H}_2\text{O}_2$  catalyzed by Cyt-c, Cyt-c-PEG-4 or Cyt-c-PEG-8. Enzyme concentration:  $0.6 \text{ mg}\cdot\text{mL}^{-1}$  Cyt-c.

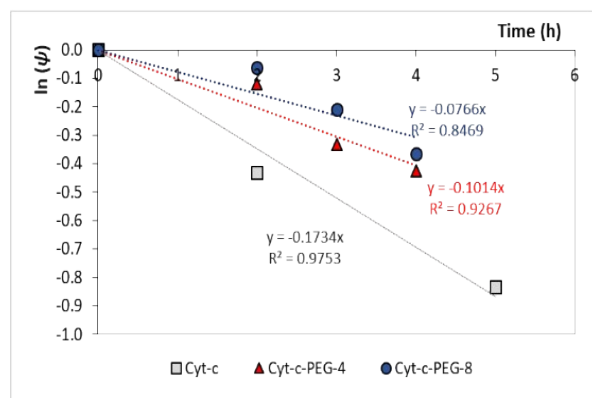

**T = 343.15 K**

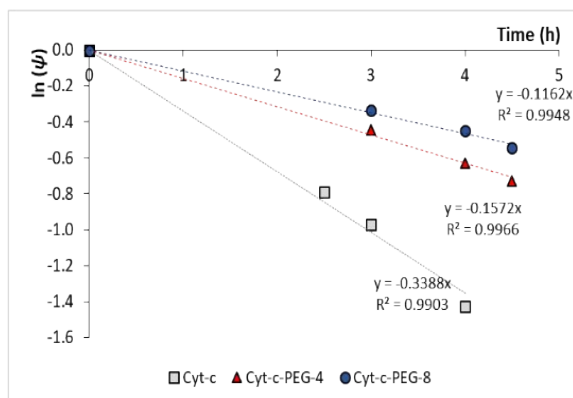

**T = 353.15 K**

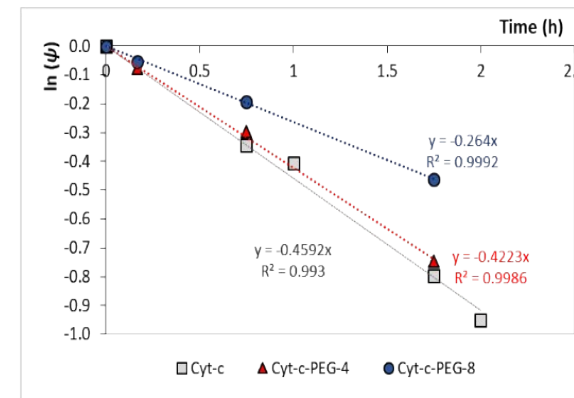

**T = 363.15 K**

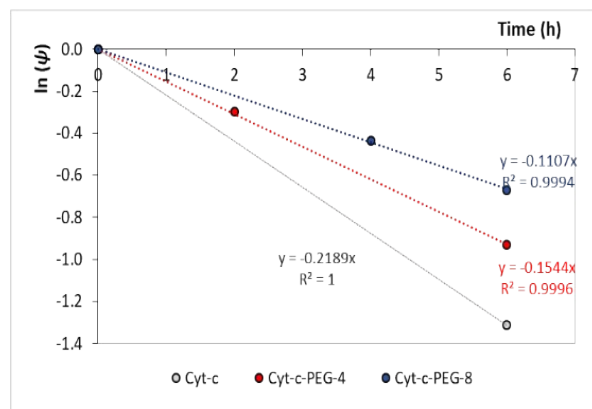

**T = 348.15 K**

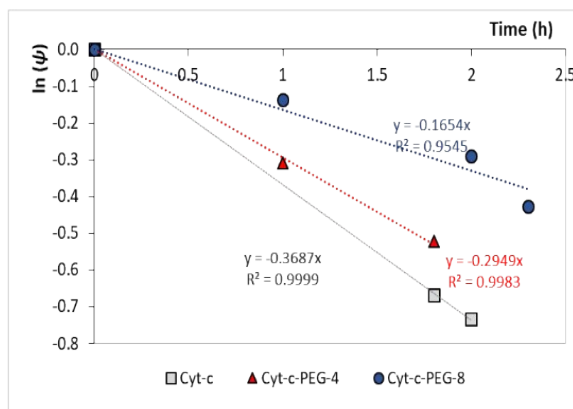

**T = 358.15 K**

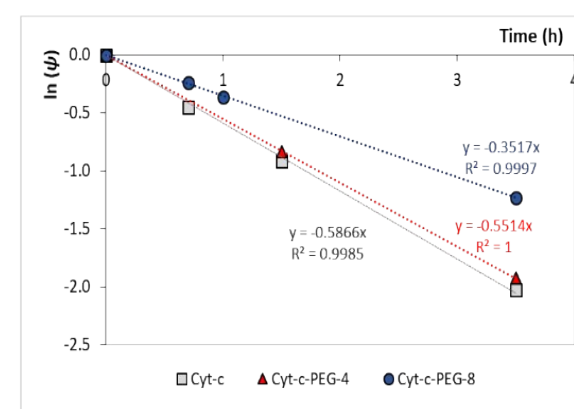

**T = 368.15 K**

**Figure S2.** Semi-log plots of irreversible denaturation of Cyt-c, Cyt-c-PEG-4 and Cyt-c-PEG-8, at different temperatures. Experimental conditions: 0.24 mL of Cyt-c ( $1.2 \times 10^{-3}$   $\mu$ M), 0.03 mL of ABTS (25 mM) and 0.03 mL of H<sub>2</sub>O<sub>2</sub> (25 mM).
